# Supplementary material for: Mass spectrometry and potentiometry studies of Al(iii)–naringin complexes
Source: Royal Society of Chemistry journal article supplement (doi:10.1039/c7ra12281k), 2017-01-01
Supplement: c7ra12281k1.pdf [file c7ra12281k1.pdf]

## Supplementary Information

### **Mass spectrometry and potentiometry studies of Al(III)–naringin complexes**

L. Bartella, E. Furia\* and L. Di Donna

Department of Chemistry and Chemical Technologies, University of Calabria, Arcavacata di Rende, Italy.

\*[emilia.furia@unical.it](mailto:emilia.furia@unical.it)

## TABLE OF CONTENTS

**Fig. S1. ESI (+) MS/MS spectrum of the ion at  $m/z$  1185**

**Fig. S2. ESI (+) MS/MS spectrum of the species at  $m/z$  623**

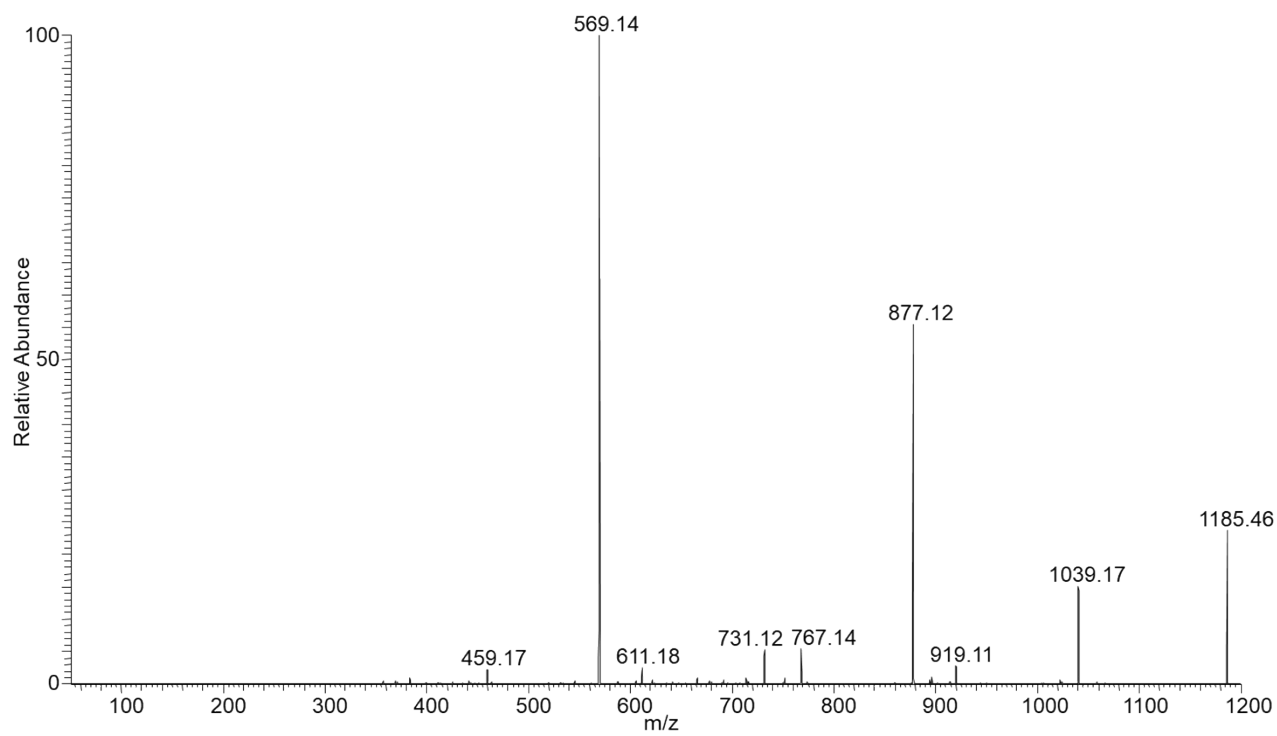

**Fig. S1.**

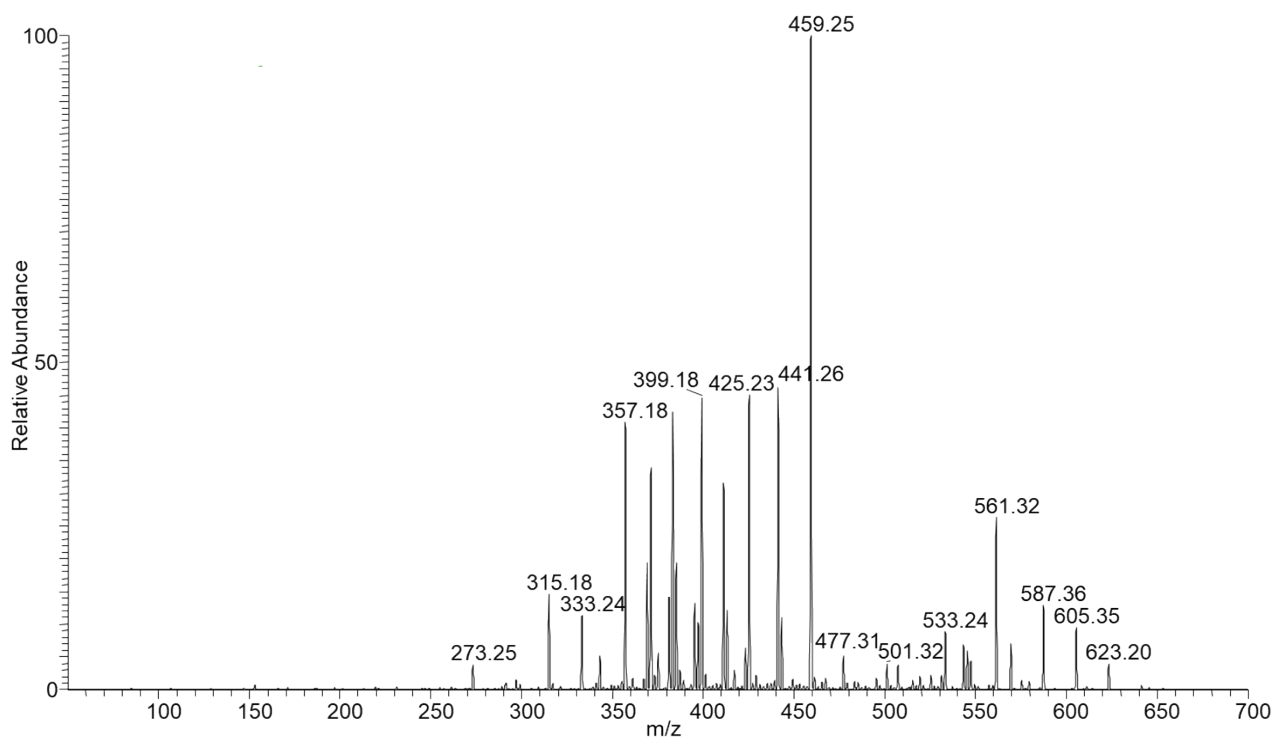

Fig. S2.
